# Supplementary material
Source: PubMed Central journal article supplement (PMC3527848)
Supplement: NIHMS423477-supplement-01.pdf [file NIHMS423477-supplement-01.pdf]

# Breast Cancer Risk Prediction and Mammography Biopsy Decisions A Model-Based Study

Katrina Armstrong, MD, Elizabeth A. Handorf, MS, Jinbo Chen, PhD, Mirar N. Bristol Demeter, MA

---

## Appendix A

Probability of cancer according to BI-RADS category and risk prediction model

### BI-RADS3

| Percentile | Standard risk factors only | Standard risk factors + 7 SNPs | Standard risk factors + 12 SNPs | 12 SNPs only  |
|------------|----------------------------|--------------------------------|---------------------------------|---------------|
| 90         | 0.0081                     | 0.0077                         | 0.0075                          | 0.0084        |
| 91         | 0.0083                     | 0.0079                         | 0.0077                          | 0.0086        |
| 92         | 0.0085                     | 0.0082                         | 0.0080                          | 0.0088        |
| 93         | 0.0088                     | 0.0085                         | 0.0083                          | 0.0090        |
| 94         | 0.0091                     | 0.0088                         | 0.0087                          | 0.0093        |
| 95         | 0.0094                     | 0.0092                         | 0.0091                          | 0.0095        |
| 96         | 0.0098                     | 0.0097                         | 0.0097                          | 0.0099        |
| 97         | <b>0.0103</b>              | <b>0.0103</b>                  | <b>0.0103</b>                   | <b>0.0103</b> |
| 98         | <b>0.0109</b>              | <b>0.0111</b>                  | <b>0.0112</b>                   | <b>0.0108</b> |
| 99         | <b>0.0119</b>              | <b>0.0124</b>                  | <b>0.0126</b>                   | <b>0.0116</b> |
| 100        | <b>0.0148</b>              | <b>0.0162</b>                  | <b>0.0167</b>                   | <b>0.0138</b> |

Note: Boldface indicates probability >1%.

BI-RADS, Breast Imaging-Reporting and Data System; SNP, single-nucleotide polymorphism

## Appendix B

### Probability of cancer according to BI-RADS category and risk prediction model

#### BI-RADS4 subcategories, weighted average with independence assumption

| Percentile | Standard risk factors only |        |        | Standard risk factors + 7 SNPs |        |        | Standard risk factors + 12 SNPs |        |        | 12 SNPs only |        |        |
|------------|----------------------------|--------|--------|--------------------------------|--------|--------|---------------------------------|--------|--------|--------------|--------|--------|
|            | 4A                         | 4B     | 4C     | 4A                             | 4B     | 4C     | 4A                              | 4B     | 4C     | 4A           | 4B     | 4C     |
| Lowest 1   | <b>0.0124</b>              | 0.0336 | 0.1816 | <b>0.0103</b>                  | 0.0279 | 0.1551 | <b>0.0095</b>                   | 0.0258 | 0.1448 | 0.0257       | 0.0681 | 0.3183 |
| 2          | <b>0.0170</b>              | 0.0455 | 0.2335 | <b>0.0139</b>                  | 0.0376 | 0.1997 | <b>0.0129</b>                   | 0.0349 | 0.1877 | 0.0292       | 0.0768 | 0.3471 |
| 3          | <b>0.0187</b>              | 0.0502 | 0.2523 | <b>0.0159</b>                  | 0.0427 | 0.2217 | <b>0.0148</b>                   | 0.0398 | 0.2095 | 0.0310       | 0.0813 | 0.3612 |
| 4          | 0.0204                     | 0.0545 | 0.2693 | <b>0.0173</b>                  | 0.0465 | 0.2376 | <b>0.0162</b>                   | 0.0436 | 0.2255 | 0.0323       | 0.0846 | 0.3713 |
| 5          | 0.0217                     | 0.0577 | 0.2813 | <b>0.0186</b>                  | 0.0497 | 0.2505 | <b>0.0174</b>                   | 0.0467 | 0.2385 | 0.0335       | 0.0874 | 0.3796 |
| 6          | 0.0231                     | 0.0613 | 0.2943 | <b>0.0196</b>                  | 0.0525 | 0.2615 | <b>0.0185</b>                   | 0.0495 | 0.2499 | 0.0344       | 0.0897 | 0.3865 |
| 7          | 0.0243                     | 0.0644 | 0.3054 | 0.0206                         | 0.0551 | 0.2713 | <b>0.0195</b>                   | 0.0521 | 0.2599 | 0.0353       | 0.0919 | 0.3926 |
| 8          | 0.0251                     | 0.0663 | 0.3122 | 0.0216                         | 0.0574 | 0.2802 | 0.0204                          | 0.0545 | 0.2690 | 0.0361       | 0.0938 | 0.3980 |
| 9          | 0.0258                     | 0.0682 | 0.3186 | 0.0224                         | 0.0596 | 0.2884 | 0.0213                          | 0.0567 | 0.2775 | 0.0368       | 0.0956 | 0.4031 |
| 10         | 0.0264                     | 0.0698 | 0.3243 | 0.0233                         | 0.0618 | 0.2961 | 0.0221                          | 0.0588 | 0.2854 | 0.0375       | 0.0972 | 0.4077 |

Note: Boldface indicates probability <2%.

BI-RADS, Breast Imaging-Reporting and Data System; SNP, single-nucleotide polymorphism

# Appendix C

## Post-test probability of malignancy for BI-RADS4

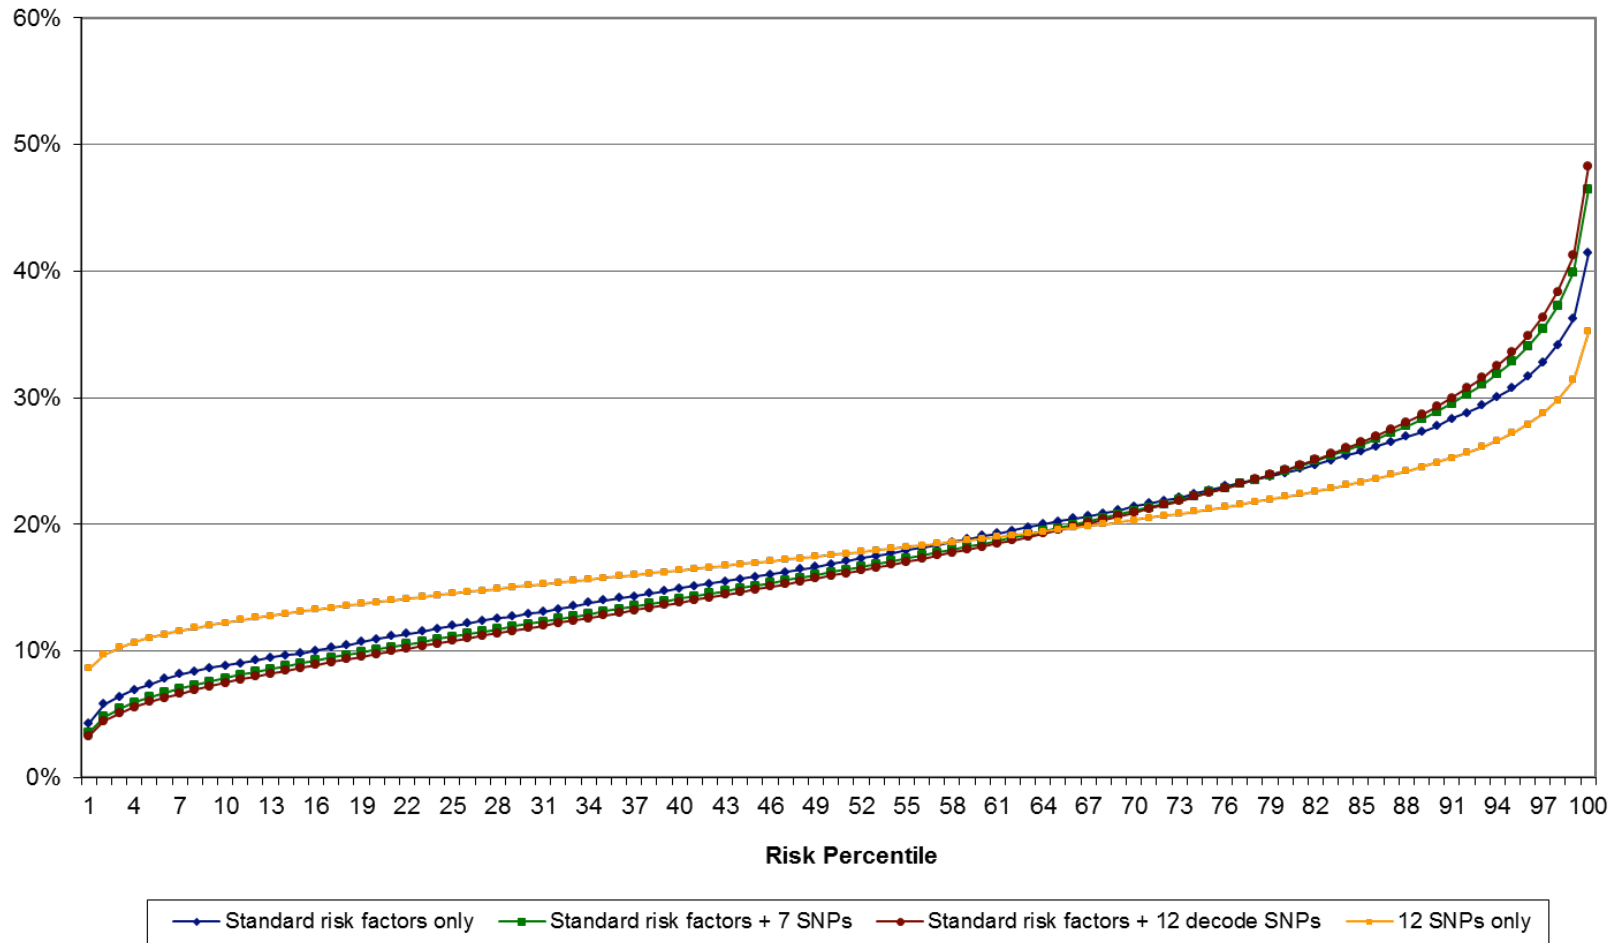

BI-RADS, Breast Imaging-Reporting and Data System; SNP, single-nucleotide polymorphism

# Appendix D

## Post-test probability malignancy, standard risk factors only

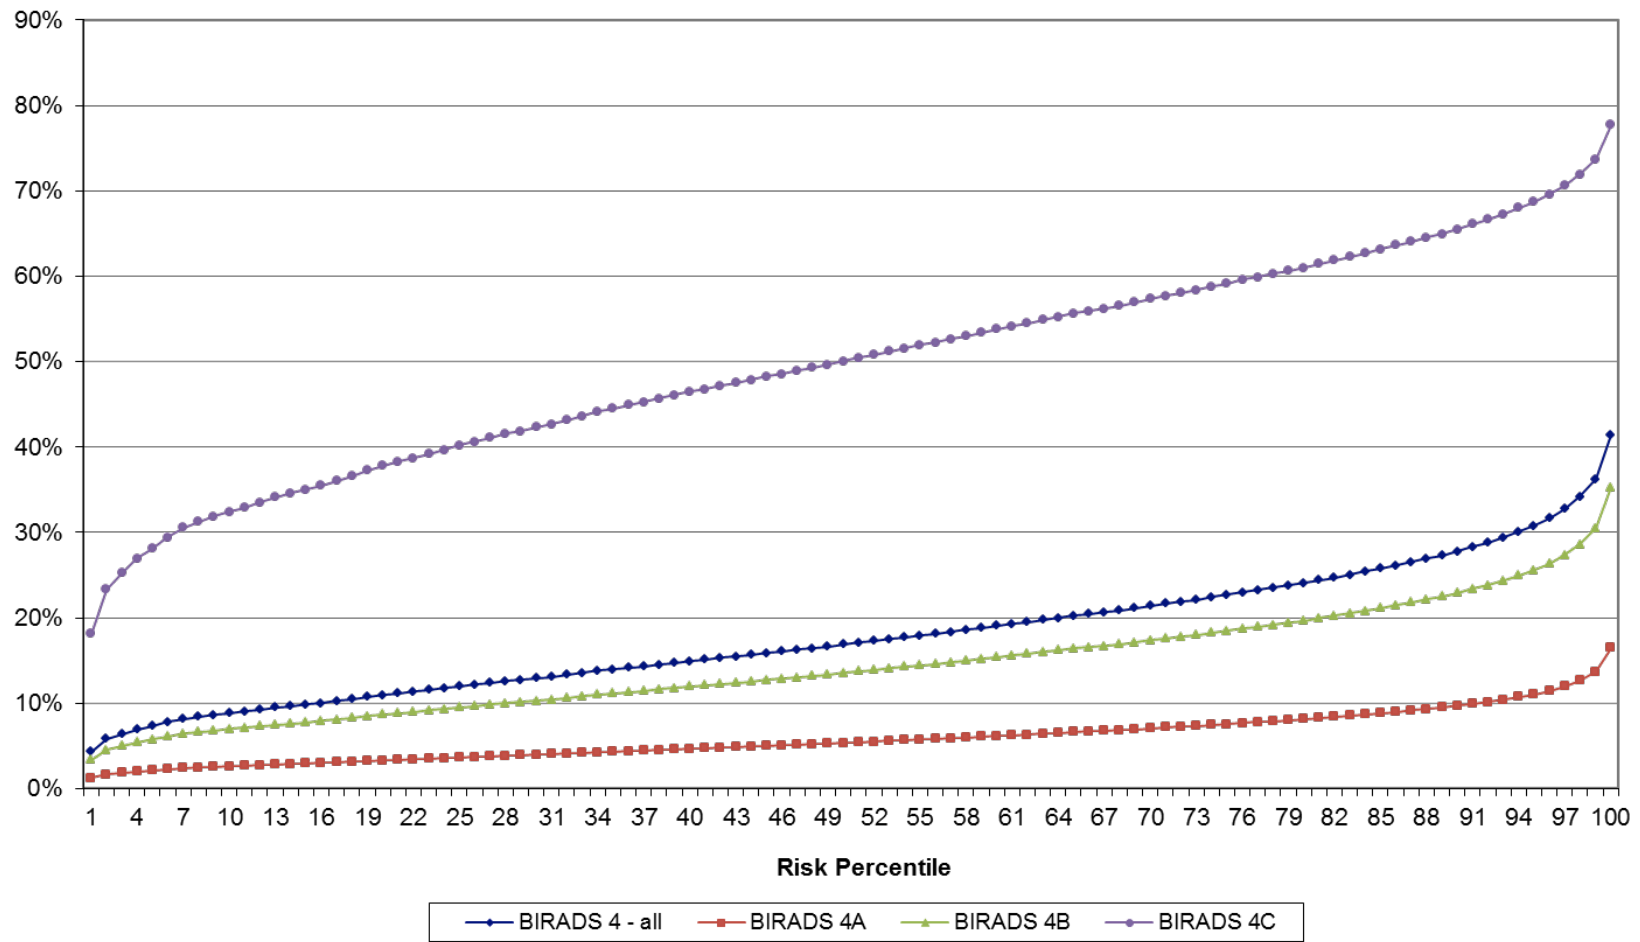

BI-RADS, Breast Imaging-Reporting and Data System
